# Supplementary material for: Phytoceramide in Vertebrate Tissues: One Step Chromatography Separation for Molecular Characterization of Ceramide Species
Source: PubMed Central journal article supplement (PMC3843679; doi:10.1371/journal.pone.0080841), 2013-11-29

# Supplemental Figure 1

A

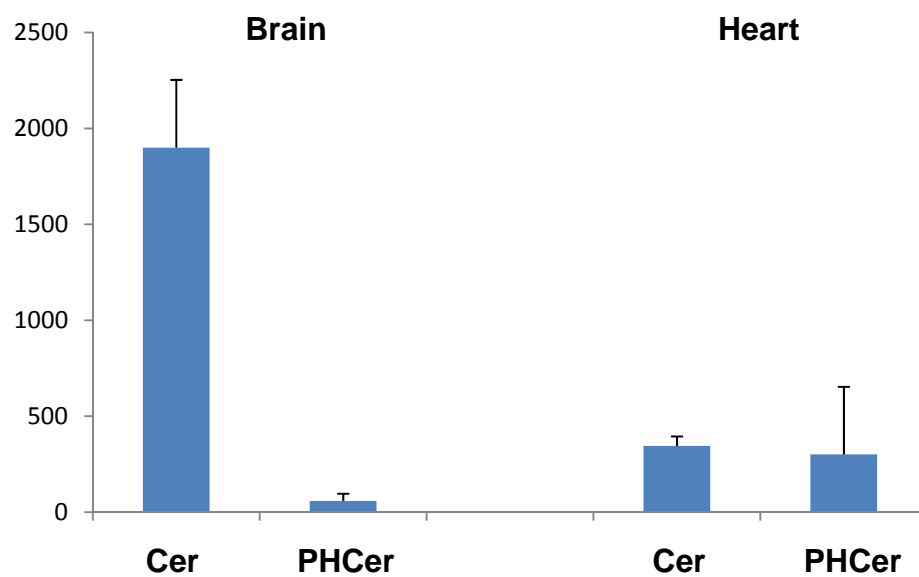

B

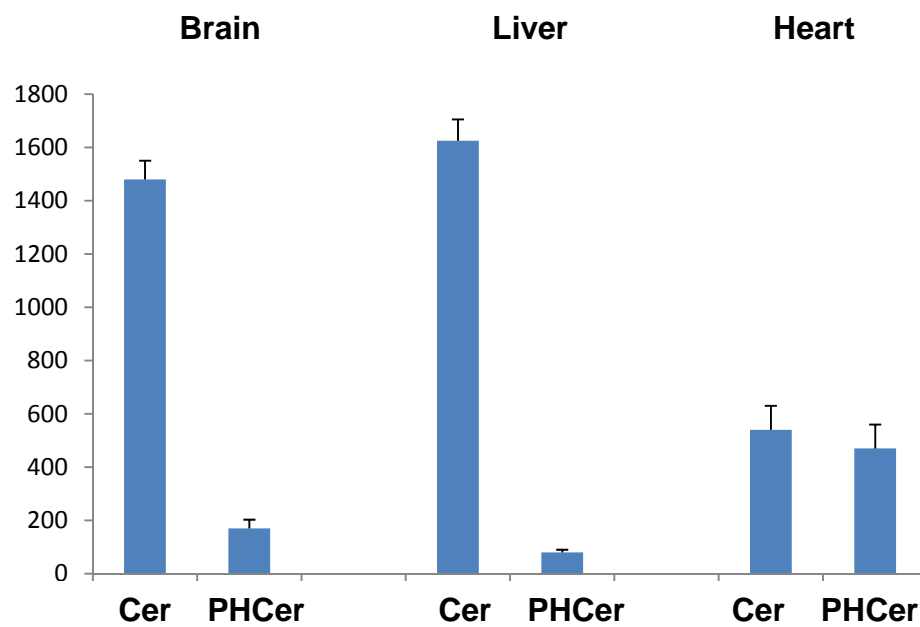

Supplement: pone.0080841.s001.pdf [file pone.0080841.s001.pdf]
